# Supplementary material for: Prevalence and Characteristics of Multidrug-Resistant Livestock-Associated Methicillin-Resistant Staphylococcus aureus (LA-MRSA) CC398 Isolated from Quails (Coturnix Coturnix Japonica) Slaughtered for Human Consumption
Source: MDPI journal article supplement (doi:10.3390/ani11072038), 2021-07-08
Supplement: s1 [file s1]

**Table S1.** Primer pairs used for molecular typing and detection of antimicrobial resistance genes in MRSA strains.

| Target gene                     | Primer sequence (5'-3')     | Amplicon size (bp) | Reference |
|---------------------------------|-----------------------------|--------------------|-----------|
| <b>Antimicrobial resistance</b> |                             |                    |           |
| <i>mecA</i>                     | F: GGGATCATAGCGTCATTATTC    | 527                | [1]       |
|                                 | R: AACGATTGTGACACGATAGCC    |                    |           |
|                                 | R: AGACCCGGGAACGTATTAC      |                    |           |
| <i>blaZ</i>                     | F: CAGTTCACATGCCAAAGAG      | 772                | [2]       |
|                                 | R: TACACTCTTGGCGGTTTC       |                    |           |
| <i>erm(A)</i>                   | F: TCTAAAAAGCATGTAAAAGAA    | 645                | [3]       |
|                                 | R: CTTGATAGTTTATTAATATTAG   |                    |           |
| <i>erm(B)</i>                   | F: GAAAAGTACTCAACCAAATA     | 639                | [4]       |
|                                 | R: AGTAACGGTACTTAAATTGTTTA  |                    |           |
| <i>erm(C)</i>                   | F: TCAAAACATAATATAGATAAA    | 642                | [3]       |
|                                 | R: GCTAATATTGTTTAAATCGTCAAT |                    |           |
| <i>erm(T)</i>                   | F: CCGCCATTGAAATAGATCCT     | 200                | [5]       |
|                                 | R: TTCTGTAGCTGTGCTTTCAAAAA  |                    |           |
| <i>msr(A/B)</i>                 | F: GCAAATGGTGTAGGTAAGACAACT | 399                | [6]       |
|                                 | R: ATCATGTGATGTAAACAAAAT    |                    |           |
| <i>mph(C)</i>                   | F: ATGACTCGACATAATGAAAT     | 900                | [2]       |
|                                 | R: CTACTCTTTCATACCTAACTC    |                    |           |

|                             |                                                                        |      |      |
|-----------------------------|------------------------------------------------------------------------|------|------|
| <i>lnuA</i>                 | F: GGTGGCTGGGGGGTAGATGTATTAAGTGG<br>R: GCTTCTTTTGAATAACATGGTATTTTCGATC | 323  | [7]  |
| <i>lnuB</i>                 | F: CCTACCTATTGTTTGTGGAA<br>R: ATAACGTTACTCTCCTATTC                     | 944  | [8]  |
| <i>vgaA</i>                 | F: AGTGGTGGTGAAGTAACACG<br>R: GGTTCATACTCAATCGACTGAG                   | 1264 | [9]  |
| <i>vgaB</i>                 | TGACAATATGAGTGGTGGTG<br>GCGACCATGAAATTGCTCTC                           | 576  | [10] |
| <i>tet(K)</i>               | F: TTAGGTGAAGGGTTAGGTCC<br>R: GCAAACATCATCCAGAAGCA                     | 697  | [11] |
| <i>tet(L)</i>               | F: CATTTGGTCTTATTGGATCG<br>R: ATTACACTTCCGATTTCCG                      | 456  | [11] |
| <i>tet(M)</i>               | F: GTTAAATAGTGTCTTGGAG<br>R: CTAAGATATGGCTCTAACAA                      | 576  | [11] |
| <i>tet(O)</i>               | F: GATGGCATAACAGGCACAGAC<br>R: CAATATCACCAGAGCAGGCT                    | 615  | [11] |
| <i>aac(6)-Ie-aph(2')-Ia</i> | F: CCAAGAGCAATAAGGGCATA<br>R: CACTATCATAACCACTACCG                     | 220  | [12] |
| <i>aph(3)-IIIa</i>          | F: GCCGATGTGGATTGCGAAAA<br>R: GCTTGATCCCCAGTAAGTCA                     | 292  | [12] |

|                  |                                                                |      |      |
|------------------|----------------------------------------------------------------|------|------|
| <i>ant(4)-Ia</i> | F: GCAAGGACCGACAACATTTTC<br>R: TGGCACAGATGGTCATAACC            | 165  | [12] |
| <i>str</i>       | F: TATTGCTCTCGAGGGTTC<br>R: CTTTCTATATCCATTCATCTC              | 646  | [13] |
| <i>fexA</i>      | F: GTACTTGTAGGTGCAATTACGGCTGA<br>R: CGCATCTGAGTAGGACATAGCGTC   | 1272 | [14] |
| <i>fexB</i>      | F: TTCCCACTATTGGTGAAAGGAT<br>R: GCAATTCCCTTTTATGGACGTT         | 816  | [15] |
| <i>catpC194</i>  | F: CGACTTTTAGTATAACCACAGA<br>R: GCCAGTCATTAGGCCTAT             | 570  | [13] |
| <i>catpC221</i>  | F: ATTTATGCAATTATGGAAGTTG<br>R: TGAAGCATGGTAACCATCAC           | 434  | [13] |
| <i>catpC223</i>  | F: GAATCAAATGCTAGTTTTAACTC<br>R: ACATGGTAACCATCACATAC          | 283  | [13] |
| <b>Virulence</b> |                                                                |      |      |
| <i>hla</i>       | F: CTGATTACTATCCAAGAAATTCGATTG<br>R: CTTTCCAGCCTACTTTTTTATCAGT | 209  | [16] |
| <i>hlb</i>       | F: GTGCACTTACTGACAATAGTGC<br>R: GTTGATGAGTAGCTACCTTCAGT        | 309  | [16] |
| <i>hld</i>       | F: AAGAATTTTTATCTTAATTAAGGAAGGAGTG                             | 456  | [16] |

|            |                                      |     |      |
|------------|--------------------------------------|-----|------|
|            | R: TTAGTGAATTTGTTCAC TGTGTCGA        |     |      |
| <i>eta</i> | F: ACTGTAGGAGCTAGTGCATTTGT           |     |      |
|            | R: TGGATACTTTTGTCTATCTTTTTCATCAAC    | 190 | [16] |
| <i>etb</i> | F: CAGATAAAGAGCTTTATACACACATTAC      |     |      |
|            | R: AGTGAAC T TATCTTTCTATTGAAAAACACTC | 612 | [16] |
| <i>tst</i> | F: TTCACTATTTGTAAAAGTGT CAGACCCACT   |     |      |
|            | R: TACTAATGAATTTT TTTATCGTAAGCCCTT   | 180 | [17] |

- [1] Zhang, K., Sparling, J., Chow, B.L., Elsayed, S., Hussain, Z., Church, D.L., Gregson, D.B., Louie, T., Conly, J.M., 2004, New quadriplex PCR assay for detection of methicillin and mupirocin resistance and simultaneous discrimination of *Staphylococcus aureus* from coagulase-negative staphylococci. *J Clin Microbiol* 42, 4947-4955.
- [2] Schnellmann, C., Gerber, V., Rossano, A., Jaquier, V., Panchaud, Y., Doherr, M.G., Thomann, A., Straub, R., Perreten, V., 2006, Presence of new *mecA* and *mph(C)* variants conferring antibiotic resistance in *Staphylococcus* spp. isolated from the skin of horses before and after clinic admission. *J Clin Microbiol* 44, 4444-4454.
- [3] Sutcliffe, J., Grebe, T., Tait-Kamradt, A., Wondrack, L., 1996, Detection of erythromycin-resistant determinants by PCR. *Antimicrob Agents Chemother* 40, 2562-2566.
- [4] Shopsin, B., Mathema, B., Alcibes, P., Said-Salim, B., Lina, G., Matsuka, A., Martinez, J., Kreiswirth, B.N., 2003, Prevalence of *agr* specificity groups among *Staphylococcus aureus* strains colonizing children and their guardians. *J Clin Microbiol* 41, 456-459.
- [5] Gomez-Sanz, E., Torres, C., Lozano, C., Fernandez-Perez, R., Aspiroz, C., Ruiz-Larrea, F., Zarazaga, M., 2010, Detection, molecular characterization, and clonal diversity of methicillin-resistant *Staphylococcus aureus* CC398 and CC97 in Spanish slaughter pigs of different age groups. *Foodborne Pathog Dis* 7, 1269-1277.
- [6] Wondrack, L., Massa, M., Yang, B.V., Sutcliffe, J., 1996, Clinical strain of *Staphylococcus aureus* inactivates and causes efflux of macrolides. *Antimicrob Agents Chemother* 40, 992-998.
- [7] Lina, G., Quaglia, A., Reverdy, M.E., Leclercq, R., Vandenesch, F., Etienne, J., 1999. Distribution of genes encoding resistance to macrolides, lincosamides, and streptogramins among staphylococci. *Antimicrob. Agents Chemother.* 43, 1062–1066.
- [8] Bozdogan, B., Berrezouga, L., Kou, M.S., Yurek, D.A., Farley, K.A., Stockman, B.J., Leclercq, R., 1999. A new resistance gene, *linB*, conferring resistance to lincosamides by nucleotidylation in *Enterococcus faecium* HM1025. *Antimicrob. Agents Chemother.* 43, 925–929.

- [9] Lozano C, Aspiroz C, Rezusta A, Gómez-Sanz E, Simon C, Gómez P, Ortega C, Revillo MJ, Zarazaga M, Torres C. Identification of novel vga(A)-carrying plasmids and a Tn5406-like transposon in methicillin-resistant *Staphylococcus aureus* and *Staphylococcus epidermidis* of human and animal origin. *Int J Antimicrob Agents*. 2012 Oct;40(4):306-12.
- [10] Hammerum, A.M., Jensen, L.B., Aarestrup, F.M., 1998. Detection of the satA gene and transferability of virginiamycin resistance in *Enterococcus faecium* from food-animals. *FEMS Microbiol. Lett.* 168, 145–151.
- [11] Aarestrup, F.M., Agers, L.Y., Ahrens, P., JC, J.L., Madsen, M., Jensen, L.B., 2000, Antimicrobial susceptibility and presence of resistance genes in staphylococci from poultry. *Vet Microbiol* 74, 353-364.
- [12] Van de Klundert, J.A.M., Vliegenthart, J.S., 1993. PCR detection of genes coding for aminoglycoside-modifying enzymes, in: Persing, D.H., Smith, T.F., Tenover, F.C., White, T.J. (Eds.), *Diagnostic Molecular Microbiology: Principles and Applications*. American Society for Microbiology, Washington D.C., pp. 547–552.
- [13] Schnellmann, C., Gerber, V., Rossano, A., Jaquier, V., Panchaud, Y., Doherr, M.G., Thomann, A., Straub, R., Perreten, V., 2006. Presence of new mecA and mph(C) variants conferring antibiotic resistance in *Staphylococcus* spp. isolated from the skin of horses before and after clinic admission. *J. Clin. Microbiol.* 44, 4444–4454.
- [14] Kehrenberg, C., Schwarz, S., 2006. Distribution of Florfenicol Resistance Genes fexA and cfr among Chloramphenicol-Resistant *Staphylococcus* Isolates. *Antimicrob. Agents Chemother.* 50, 1156–1163.
- [15] Liu, H., Wang, Y., Wu, C., Schwarz, S., Shen, Z., Jeon, B., Ding, S., Zhang, Q., Shen, J., 2012. A novel phenicol exporter gene, fexB, found in enterococci of animal origin. *J. Antimicrob. Chemother.* 67, 322–325.
- [16] Jarraud, S., Mougel, C., Thioulouse, J., Lina, G., Meugnier, H., Forey, F., Nesme, X., Etienne, J., Vandenesch, F., 2002. Relationships between *Staphylococcus aureus* genetic background, virulence factors, agr groups (alleles), and human disease. *Infect. Immun.* 70, 631–641.
- [17] Yamaguchi, T., Nishifuji, K., Sasaki, M., Fudaba, Y., Aepfelbacher, M., Takata, T., Ohara, M., Komatsuzawa, H., Amagai, M., Sugai, M., 2002. Identification of the *Staphylococcus aureus* etd pathogenicity island which encodes a novel exfoliative toxin, ETD, and EDIN-B. *Infect. Immun.* 70, 5835–5845.
